# Supplementary material for: A mesodermal fate map for adipose tissue
Source: Oxford University Press journal article supplement (doi:10.1242/dev.166801), 2018-07-25
Supplement: dev166801supp.pdf [file dev166801supp.pdf]

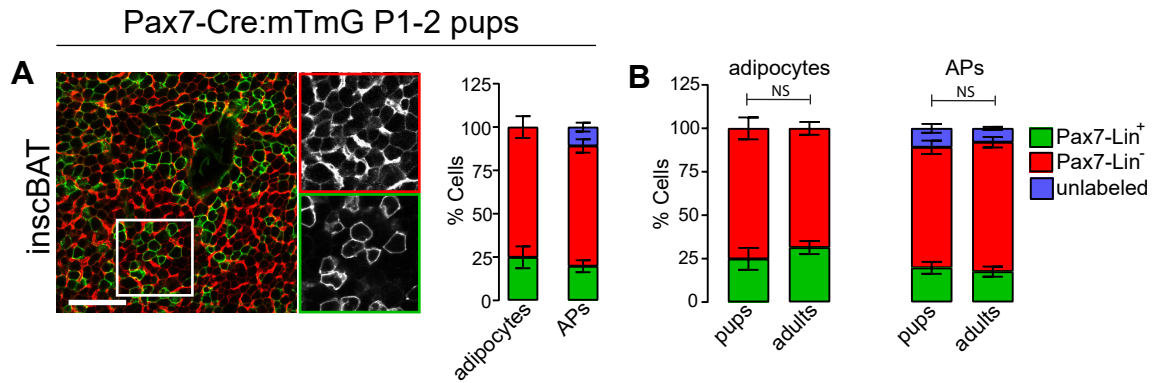

**Supplementary Figure 1. Pax7<sup>Lin+</sup> cells contribute equally to neonatal and adult brown adipocyte lineages.** (A) Representative confocal image of brown fat from a 2 day old Pax7-Cre:mTmG pup with quantification of adipocyte and AP labeling. (B) Comparison of adipocyte and AP labeling between 1-2 day old pups and adult Pax7-Cre:mTmG animals from Figure 3. Data from males and females was pooled for pups and adults. The black and white subset images indicate red (top) or green (bottom) channels. n=4 pups, n=12 adults. Error bars indicate mean  $\pm$  SEM. NS = not significant. Scale bar is 100  $\mu$ m.

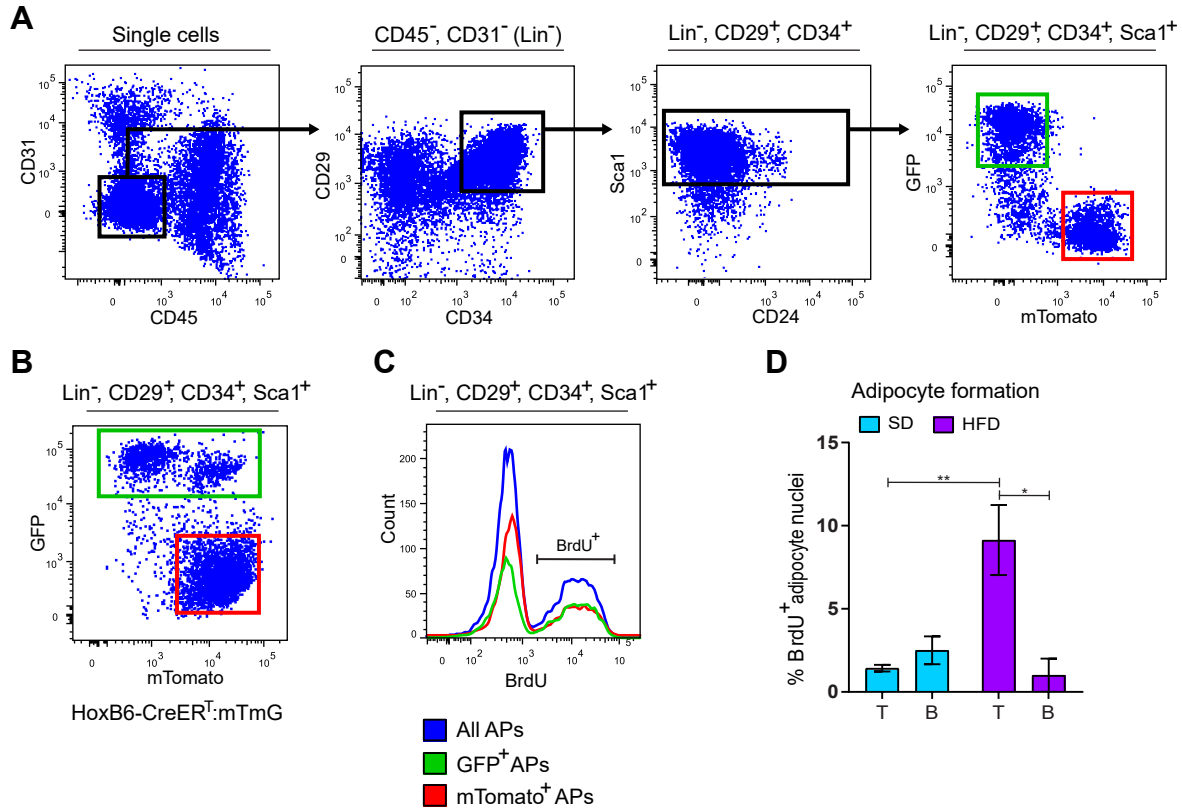

**Supplementary Figure 2. Representative flow cytometry analysis of APs and adipogenesis in male perigonadal fat.** (A) Representative flow plot for the identification of mGFP<sup>+</sup> and mTomato<sup>+</sup> APs in constitutive Cre strains. (B) Representative flow plot of mGFP<sup>+</sup>, mTomato<sup>+</sup> and mGFP/mTomato double-positive APs in the inducible HoxB6-CreERT:mTmG strain. (C) Method for quantifying BrdU incorporation into APs of distinct lineages. (D) Percent adipocytes arising from proliferative APs in the tip and base of male perigonadal fat (n = 4-5). Adipose tissue was imbedded in paraffin, sectioned and immunostained for BrdU following 1 week of BrdU treatment (pulse) and seven additional weeks of the indicated diet (chase). Sections were imaged via a Leica TCS SP5 confocal microscope and BrdU<sup>+</sup> adipocyte nuclei were manually quantified in each condition. SD = standard diet, HFD = high fat diet. \*(P<0.05), \*\*(P<0.01). Statistical significance was determined using an unpaired Student's t test for indicated groups.

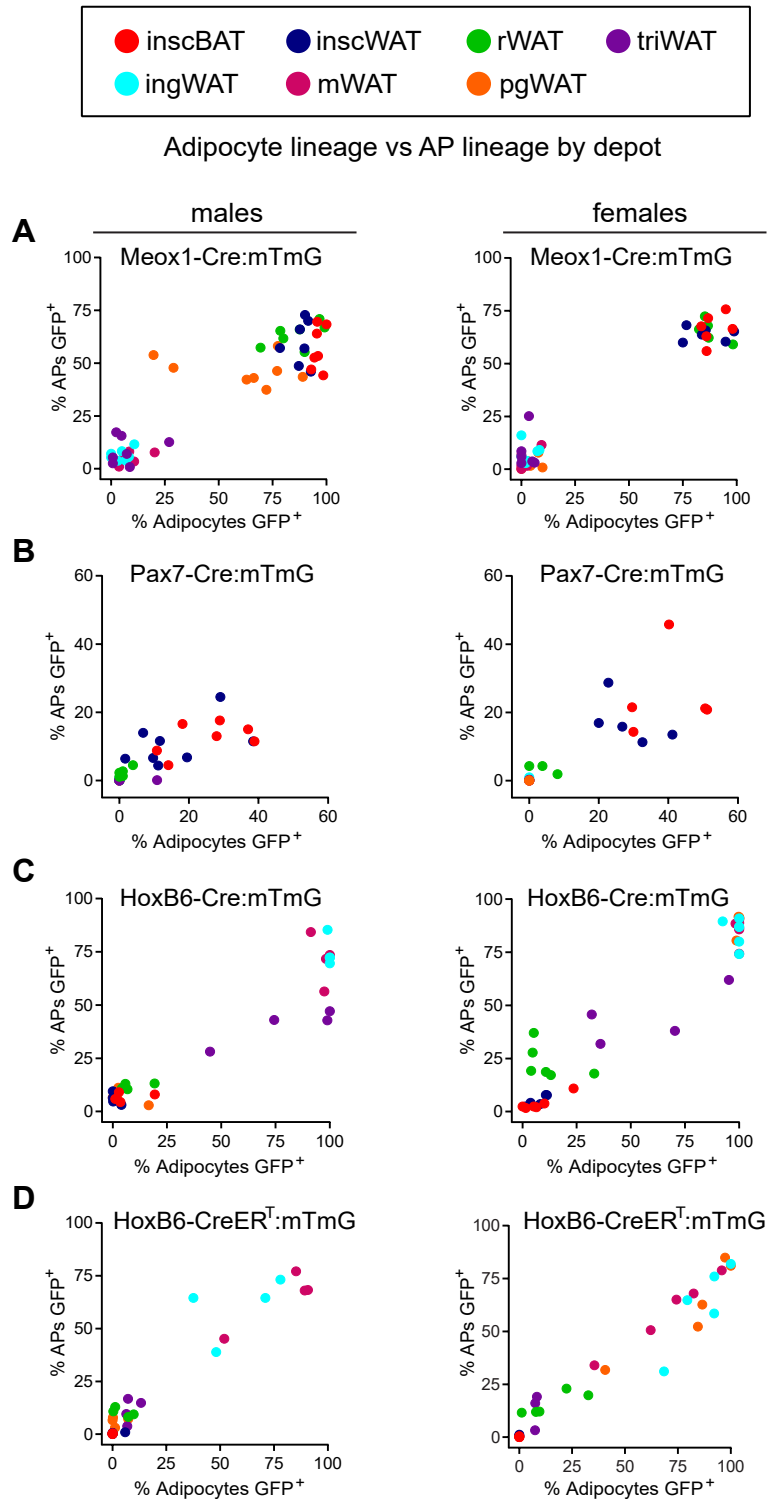

**Supplementary Figure 3. Depot-specific adipocyte and AP labeling are largely concordant across tracing paradigms.**

Each scatter plot shows percent mGFP+ adipocytes on the x-axis and percent mGFP+ APs on the y-axis. Each adipose depot is denoted by a single color (red = inscBAT, blue = inscWAT, green = rWAT, purple = triWAT, teal = ingWAT, magenta = mWAT, orange = pgWAT). Each dot represents a single biological replicate (i.e. one animal). Given that each adipose depot exists in a pair, one depot was used for quantifying adipocyte labeling and the other was used to quantify AP tracing per animal. Adipocyte tracing is presented alone in figures 2 through 5. AP tracing is presented alone in figure 6. Data from males and females are shown for each tracing paradigm. (A) Meox1-Cre:mTmG. (B) Pax7-Cre:mTmG. (C) HoxB6-Cre:mTmG. (D) HoxB6-CreERT:mTmG. inscBAT = interscapular brown adipose tissue, inscWAT = interscapular white adipose tissue, rWAT = retroperitoneal white adipose tissue, triWAT = triceps white adipose tissue, ingWAT = inguinal white adipose tissue, mWAT = mesenteric white adipose tissue, pgWAT = perigonadal white adipose tissue.

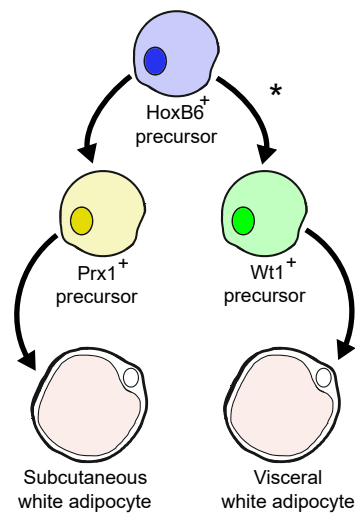

**Supplementary Figure 4. Model cell lineage hierarchy for subcutaneous and visceral adipocytes.**

Based on HoxB6-Cre:mTmG and HoxB6-CreERT:mTmG tracing in this study as well as Prx1-Cre:mTmG and WT1-Cre:mTmG tracing from Sanchez-Gurmaches et al. (Sanchez-Gurmaches et al., 2015) and Chau et al. (Chau et al., 2014), respectively. The asterisk denotes the exception of male perigonadal adipocytes which predominately arise from Pax3<sup>Lin+</sup>/Meox1<sup>Lin+</sup> progenitors in the somites.

**References**

Chau, Y.-Y., Bandiera, R., Serrels, A., Martínez-Estrada, O. M., Qing, W., Lee, M., Slight, J., Thornburn, A., Berry, R. and McHaffie, S. (2014). Visceral and subcutaneous fat have different origins and evidence supports a mesothelial source. *Nature cell biology* 16, 367.

Sanchez-Gurmaches, J., Hsiao, W.-Y. and Guertin, D. A. (2015). Highly selective in vivo labeling of subcutaneous white adipocyte precursors with Prx1-Cre. *Stem cell reports* 4, 541-550.

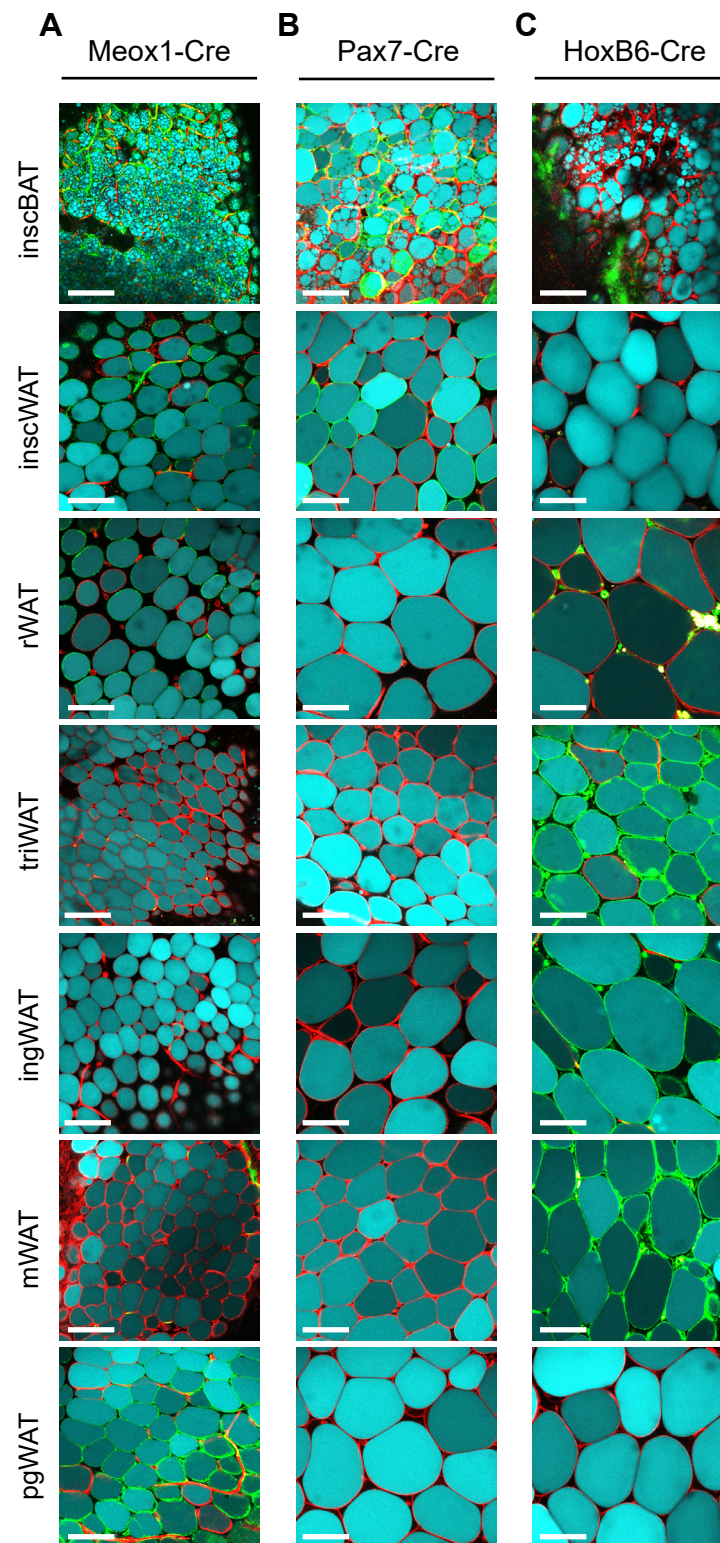

**Supplementary Figure 5. Lipid staining of adipocytes in lineage tracing systems.** Approximately 1.5x1.5 cm chunks of each adipose depot were dissected and stained with LipidTOX Deep Red (Invitrogen H34477) in PBS for 1 hr at room temperature. Following this incubation, tissue was washed once in PBS and mounted for confocal imaging as described in the “Whole Mount and Confocal Imaging” section. (A) Meox1-Cre:mTmG adipose tissue from an ~7 month old male. (B) ~10 month old Pax7-Cre:mTmG male. (C) ~10 month old HoxB6-Cre:mTmG male. Scale bar = 100  $\mu$ m.



HoxB6-CreER<sup>T</sup>:mTmG (Adult Tamoxifen)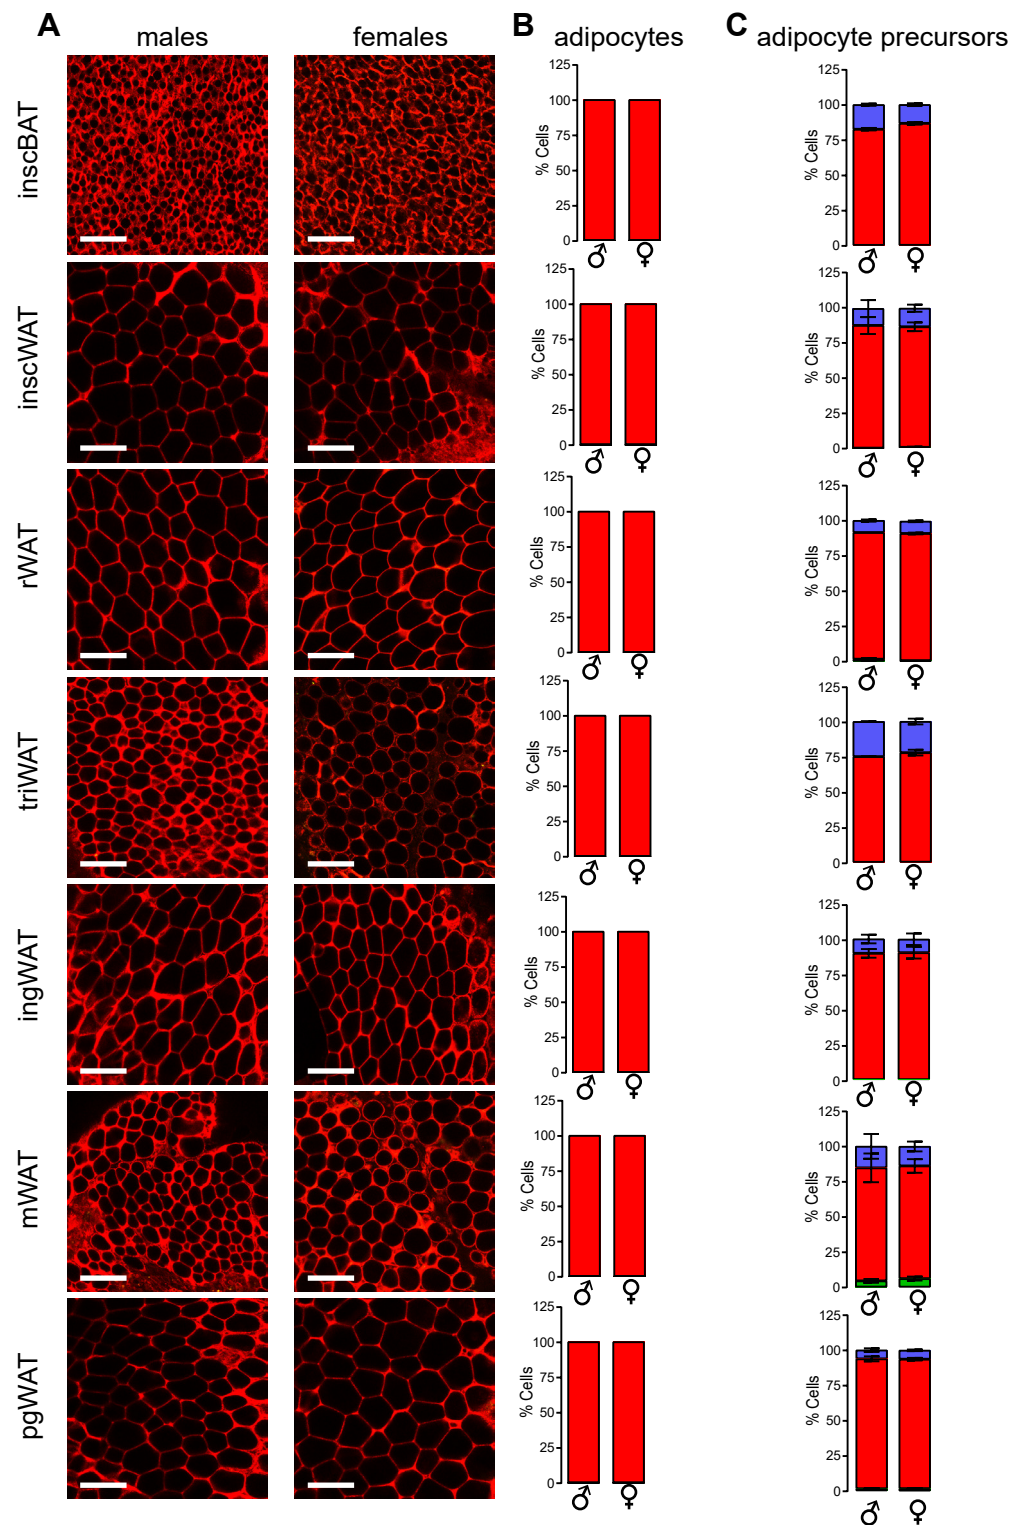

**Supplementary Figure 6. Adult tamoxifen treatment does not trace the adipocyte lineage in HoxB6-CreER<sup>T</sup>:mTmG animals.** Mice were intraperitoneally injected with 50mg/kg tamoxifen in vegetable oil once a day for five days; 72 hours later, animals were sacrificed and adipose tissue harvested. (A) representative images of indicated adipose depots. (B) quantification of mGFP+ and mTomato+ adipocytes. (C) quantification of mGFP+ and mTomato+ adipocyte precursors. Data are from males (n = 2) and females (n = 2) of ~7.5 months of age. Adipocyte tracing was analyzed by confocal microscopy and adipocyte precursor tracing was analyzed by flow cytometry. Error bars represent mean  $\pm$  SEM. Scale bar = 100  $\mu$ m.
